# Supplementary material for: State-Level Affordability of Factory-Made Cigarettes among Current US Smokers: Findings from the ITC US Survey, 2003–2015
Source: MDPI journal article supplement (doi:10.3390/ijerph16132439), 2019-07-09
Supplement: s1 [file s1]

Table S1. Wave-specific linear mixed effects models to estimate state-level real cigarette prices per pack of 20 in 2015 USD (ITC US Survey Wave 2–Wave 9).

|                                    | Wave 2<br>(2003)<br>n = 1805 | Wave 3<br>(2004)<br>n = 1835 | Wave 4<br>(2005)<br>n = 1720 | Wave 5<br>(2006)<br>n = 1697 | Wave 6<br>(2007)<br>n = 1573 | Wave 7<br>(2008)<br>n = 1366 | Wave 8<br>(2010)<br>n = 1124 | Wave 9a<br>(2013)<br>n = 668 | Wave 9b<br>(2015)<br>n = 1403 |
|------------------------------------|------------------------------|------------------------------|------------------------------|------------------------------|------------------------------|------------------------------|------------------------------|------------------------------|-------------------------------|
|                                    | $\beta$ (SE)                  |
| <b>Fixed effects</b>               |                              |                              |                              |                              |                              |                              |                              |                              |                               |
| (Intercept)                        | 4.32 (0.15)*                 | 4.13 (0.16)*                 | 4.25 (0.17)*                 | 4.14 (0.18)*                 | 4.51 (0.20)*                 | 5.39 (0.25)*                 | 5.83 (0.32)*                 | 5.20 (0.45)*                 | 5.55 (0.28)*                  |
| Gender (female vs male)            | -0.09 (0.06)                 | -0.01 (0.06)                 | 0.02 (0.06)                  | 0.02 (0.06)                  | 0.00 (0.06)                  | -0.11 (0.08)                 | -0.18 (0.10)                 | 0.16 (0.13)                  | -0.04 (0.10)                  |
| Age group (25-39 vs 18-24)         | -0.32 (0.10)†                | -0.14 (0.11)                 | -0.15 (0.12)                 | -0.14 (0.13)                 | -0.20 (0.17)                 | -0.77 (0.23)*                | -0.49 (0.30)                 | 0.28 (0.44)                  | 0.41 (0.22)                   |
| Age group (40-54 vs 18-24)         | -0.60 (0.09)*                | -0.51 (0.10)*                | -0.55 (0.11)*                | -0.47 (0.12)*                | -0.51 (0.16)†                | -1.17 (0.22)*                | -0.53 (0.28)                 | -0.04 (0.41)                 | -0.05 (0.21)                  |
| Age group (55+ vs 18-24)           | -0.80 (0.10)*                | -0.71 (0.11)*                | -0.71 (0.12)*                | -0.70 (0.13)*                | -0.72 (0.16)*                | -1.37 (0.22)*                | -0.75 (0.29)†                | -0.21 (0.41)                 | -0.31 (0.21)                  |
| Race/ethnicity (Black vs white)    | 0.60 (0.10)*                 | 0.84 (0.11)*                 | 0.81 (0.11)*                 | 0.54 (0.11)*                 | 0.61 (0.12)*                 | 0.81 (0.14)*                 | 1.00 (0.17)*                 | 0.69 (0.24)†                 | 0.71 (0.16)*                  |
| Race/ethnicity (Hispanic vs white) | 0.43 (0.13)†                 | 0.42 (0.15)†                 | 0.09 (0.18)                  | 0.35 (0.16)‡                 | 0.35 (0.19)                  | 0.21 (0.25)                  | 0.82 (0.33)‡                 | 0.13 (0.60)                  | 0.92 (0.17)*                  |
| Race/ethnicity (other vs white)    | 0.02 (0.11)                  | 0.11 (0.12)                  | 0.38 (0.11)†                 | 0.32 (0.13)‡                 | 0.27 (0.14)‡                 | 0.28 (0.16)                  | -0.07 (0.19)                 | 0.14 (0.29)                  | 0.30 (0.20)                   |
| High school education (vs greater) | -0.12 (0.06)‡                | -0.12 (0.06)‡                | 0.00 (0.06)                  | -0.06 (0.06)                 | -0.11 (0.06)                 | -0.20 (0.08)†                | -0.32 (0.10)†                | -0.34 (0.13)‡                | -0.26 (0.10)‡                 |
| Employed (vs otherwise)            | 0.20 (0.06)†                 | 0.20 (0.06)†                 | 0.19 (0.06)†                 | 0.26 (0.06)*                 | 0.19 (0.07)†                 | 0.26 (0.08)†                 | 0.25 (0.10)‡                 | 0.35 (0.14)‡                 | 0.30 (0.10)†                  |
| <b>Random effects</b>              |                              |                              |                              |                              |                              |                              |                              |                              |                               |
| N state                            | 51                           | 51                           | 51                           | 51                           | 50                           | 50                           | 49                           | 49                           | 51                            |
| $\sigma^2$                         | 1.381                        | 1.403                        | 1.328                        | 1.364                        | 1.434                        | 1.875                        | 2.512                        | 2.669                        | 3.143                         |
| $\tau_{00}$ , state                | 0.573                        | 0.653                        | 0.699                        | 0.640                        | 0.612                        | 0.579                        | 0.697                        | 1.001                        | 1.352                         |
| ICC state                          | 0.293                        | 0.318                        | 0.345                        | 0.319                        | 0.299                        | 0.236                        | 0.217                        | 0.273                        | 0.301                         |
| Test of random effect: $\chi^2_1$  | 455*                         | 560*                         | 525*                         | 448*                         | 318*                         | 229*                         | 145*                         | 103*                         | 297*                          |

\* p < 0.001; † p < 0.01; ‡ p < 0.05

Table S2. Self-reported real cigarette price/pack of 20 (2015 USD) by state from 2003 to 2015 (ITC US Survey Wave 2–Wave 9).

| Region    | State | Wave 2 | Wave 3 | Wave 4 | Wave 5 | Wave 6 | Wave 7 | Wave 8 | Wave 9a | Wave 9b | Trend |
|-----------|-------|--------|--------|--------|--------|--------|--------|--------|---------|---------|-------|
|           |       | (2003) | (2004) | (2005) | (2006) | (2007) | (2008) | (2010) | (2013)  | (2015)  |       |
| Northeast | CT    | 5.70   | 5.29   | 5.07   | 5.38   | 5.46   | 5.85   | 7.18   | 6.96    | 8.50    |       |
|           | MA    | 5.38   | 5.00   | 5.15   | 4.96   | 4.88   | 5.76   | 6.72   | 6.64    | 7.86    |       |
|           | ME    | 4.31   | 4.23   | 5.05   | 4.94   | 5.07   | 5.39   | 5.88   | 5.98    | 6.28    |       |
|           | NH    | 4.14   | 3.61   | 3.82   | 4.08   | 4.63   | 4.39   | 5.24   | 4.91    | 5.63    |       |
|           | NJ    | 5.69   | 6.32   | 5.80   | 5.76   | 5.94   | 6.05   | 6.77   | 7.28    | 7.67    |       |
|           | NY    | 5.18   | 5.07   | 5.27   | 5.23   | 4.96   | 5.40   | 6.27   | 6.04    | 7.88    |       |
|           | PA    | 4.25   | 4.61   | 4.50   | 4.62   | 4.64   | 4.88   | 5.93   | 5.67    | 6.33    |       |
|           | RI    | 4.28   | 5.81   | 4.78   | 5.34   | 5.27   | 5.18   | 6.05   | 6.13    | 7.25    |       |
|           | VT    | 4.11   | 3.77   | 4.42   | 4.52   | 5.37   | 5.03   | 6.11   | 5.83    | 6.55    |       |
| Midwest   | IA    | 3.48   | 3.27   | 3.19   | 3.28   | 4.51   | 5.07   | 5.69   | 5.81    | 5.54    |       |
|           | IL    | 4.41   | 4.55   | 4.84   | 4.58   | 4.52   | 5.11   | 5.62   | 6.34    | 6.64    |       |
|           | IN    | 3.87   | 3.59   | 3.71   | 3.52   | 4.23   | 4.59   | 4.98   | 4.91    | 5.35    |       |
|           | KS    | 3.80   | 3.93   | 3.61   | 3.36   | 3.63   | 4.05   | 4.84   | 4.60    | 4.67    |       |
|           | MI    | 4.58   | 5.04   | 5.25   | 4.90   | 5.22   | 5.38   | 5.90   | 5.60    | 6.12    |       |
|           | MN    | 4.04   | 3.57   | 4.96   | 4.48   | 4.44   | 4.83   | 5.61   | 6.60    | 7.31    |       |
|           | MO    | 3.40   | 3.06   | 3.21   | 3.07   | 3.00   | 3.27   | 3.67   | 3.42    | 3.82    |       |
|           | ND    | 4.07   | 4.16   | 3.70   | 4.06   | 4.32   | 4.68   | 4.99   | 4.57    | 8.25    |       |
|           | NE    | 4.21   | 3.75   | 3.73   | 3.32   | 4.33   | 4.75   | 5.52   | 5.83    | 4.92    |       |
|           | OH    | 3.80   | 3.56   | 4.28   | 4.27   | 4.30   | 4.70   | 5.26   | 5.19    | 5.46    |       |
|           | SD    | 3.54   | 3.34   | 3.84   | 3.72   | 4.95   | 4.75   | 5.54   | n/a     | 5.34    |       |
|           | WI    | 4.08   | 3.96   | 4.02   | 4.03   | 4.12   | 5.30   | 6.45   | 7.09    | 6.99    |       |
| South     | AL    | 3.66   | 3.85   | 3.79   | 3.68   | 3.62   | 4.16   | 4.72   | 4.52    | 4.60    |       |
|           | AR    | 3.35   | 3.54   | 3.85   | 3.52   | 3.84   | 4.38   | 4.94   | 5.00    | 5.18    |       |
|           | DC    | 5.53   | 4.85   | 4.78   | 4.54   | n/a    | n/a    | n/a    | 5.18    | 6.36    |       |
|           | DE    | 3.43   | 3.42   | 3.57   | 3.70   | 4.41   | 4.57   | 5.39   | 5.50    | 5.82    |       |
|           | FL    | 3.55   | 3.48   | 3.28   | 3.42   | 3.29   | 3.55   | 5.13   | 5.24    | 5.16    |       |
|           | GA    | 3.35   | 3.83   | 3.57   | 3.37   | 3.45   | 3.96   | 4.21   | 4.37    | 4.57    |       |
|           | KY    | 2.76   | 2.68   | 3.03   | 2.97   | 3.17   | 3.17   | 4.59   | 4.34    | 4.45    |       |
|           | LA    | 3.87   | 3.48   | 3.66   | 3.45   | 3.75   | 4.03   | 4.59   | 4.87    | 5.22    |       |
|           | MD    | 4.32   | 4.30   | 4.26   | 4.16   | 4.63   | 5.56   | 6.12   | 6.19    | 6.52    |       |
|           | MS    | 3.05   | 3.15   | 3.02   | 3.10   | 3.18   | 3.67   | 4.74   | 4.70    | 4.87    |       |
|           | NC    | 3.11   | 3.05   | 3.33   | 3.43   | 3.67   | 3.93   | 4.45   | 4.34    | 4.54    |       |
|           | OK    | 3.14   | 3.12   | 3.66   | 3.49   | 3.44   | 3.95   | 4.68   | 5.09    | 4.82    |       |
|           | SC    | 2.90   | 2.95   | 2.99   | 2.86   | 3.07   | 3.50   | 4.33   | 4.61    | 5.56    |       |
|           | TN    | 3.06   | 3.35   | 3.39   | 3.17   | 3.71   | 3.79   | 4.48   | 4.44    | 5.19    |       |
|           | TX    | 3.75   | 3.45   | 3.49   | 3.82   | 4.48   | 4.96   | 5.62   | 5.33    | 5.74    |       |
|           | VA    | 3.00   | 3.17   | 3.39   | 3.49   | 3.39   | 3.86   | 5.16   | 4.48    | 4.74    |       |
|           | WV    | 3.32   | 3.10   | 3.30   | 3.29   | 3.63   | 3.98   | 4.78   | 4.86    | 4.70    |       |
| West      | AK    | 5.23   | 4.74   | 5.97   | 5.21   | 6.04   | 5.52   | 6.32   | 7.27    | 5.39    |       |
|           | AZ    | 4.51   | 4.49   | 4.65   | 4.92   | 4.85   | 4.85   | 5.51   | 5.79    | 5.97    |       |
|           | CA    | 4.70   | 4.64   | 4.40   | 4.55   | 4.37   | 4.55   | 5.37   | 5.29    | 5.82    |       |
|           | CO    | 3.51   | 3.13   | 3.85   | 3.81   | 4.11   | 4.44   | 5.17   | 4.89    | 5.06    |       |
|           | HI    | 4.30   | n/a    | 4.42   | 4.40   | 4.42   | 4.80   | n/a    | n/a     | 6.74    |       |
|           | ID    | 3.58   | 3.95   | 3.81   | 3.65   | 4.13   | 3.66   | 5.24   | 5.60    | 4.97    |       |
|           | MT    | 3.59   | 4.01   | 5.83   | 5.02   | 4.36   | 4.87   | 5.18   | 5.57    | 5.35    |       |
|           | NM    | 3.97   | 4.04   | 3.95   | 3.71   | 4.05   | 4.16   | 5.04   | 5.14    | 5.12    |       |
|           | NV    | 3.29   | 3.68   | 3.78   | 3.66   | 3.84   | 4.06   | 4.55   | 4.40    | 4.90    |       |
|           | OR    | 4.32   | 4.04   | 4.14   | 4.00   | 4.43   | 4.65   | 5.44   | 5.18    | 5.33    |       |
|           | UT    | 4.19   | 4.20   | 3.98   | 4.02   | 4.53   | 4.84   | 5.40   | 5.63    | 5.74    |       |
|           | WA    | 4.70   | 4.91   | 5.51   | 5.44   | 4.96   | 5.12   | 6.09   | 6.40    | 6.46    |       |
|           | WY    | 3.69   | 3.46   | 3.36   | 3.37   | 3.85   | 4.51   | 4.95   | 4.88    | 5.23    |       |

n/a: No observations in a given state and survey wave to estimate self-reported price.

Table S3. Wave-specific linear mixed effects models to estimate state-level cigarette affordability (log(RIP), ITC US Survey Wave 2–Wave 9).

|                                    | Wave 2<br>(2003)<br>n = 1691 | Wave 3<br>(2004)<br>n = 1740 | Wave 4<br>(2005)<br>n = 1623 | Wave 5<br>(2006)<br>n = 1605 | Wave 6<br>(2007)<br>n = 1484 | Wave 7<br>(2008)<br>n = 1263 | Wave 8<br>(2010)<br>n = 1017 | Wave 9a<br>(2013)<br>n = 619 | Wave 9b<br>(2015)<br>n = 1403 |
|------------------------------------|------------------------------|------------------------------|------------------------------|------------------------------|------------------------------|------------------------------|------------------------------|------------------------------|-------------------------------|
|                                    | $\beta$ (SE)                  |
| <b>Fixed effects</b>               |                              |                              |                              |                              |                              |                              |                              |                              |                               |
| (Intercept)                        | -3.606 (0.080) *             | -3.657 (0.083) *             | -3.459 (0.096) *             | -3.682 (0.104) *             | -3.629 (0.116) *             | -3.469 (0.137) *             | -3.091 (0.180) *             | -2.919 (0.240) *             | -3.340 (0.116) *              |
| Gender (female vs male)            | 0.197 (0.040) *              | 0.185 (0.039) *              | 0.145 (0.042) *              | 0.171 (0.043) *              | 0.241 (0.044) *              | 0.106 (0.046) ‡              | 0.000 (0.053)                | 0.163 (0.071) ‡              | 0.224 (0.049) *               |
| Age group (25-39 vs 18-24)         | -0.091 (0.069)               | -0.094 (0.073)               | -0.159 (0.083)               | 0.055 (0.095)                | -0.030 (0.117)               | -0.086 (0.140)               | -0.176 (0.181)               | -0.270 (0.246)               | 0.146 (0.110)                 |
| Age group (40-54 vs 18-24)         | -0.412 (0.066) *             | -0.387 (0.069) *             | -0.470 (0.079) *             | -0.298 (0.090) *             | -0.315 (0.110) †             | -0.369 (0.132) †             | -0.417 (0.172) ‡             | -0.533 (0.232) ‡             | -0.075 (0.108)                |
| Age group (55+ vs 18-24)           | -0.555 (0.073) *             | -0.523 (0.075) *             | -0.581 (0.084) *             | -0.380 (0.095) *             | -0.421 (0.112) *             | -0.437 (0.133) †             | -0.487 (0.173) †             | -0.588 (0.232) ‡             | -0.396 (0.106) *              |
| Race/ethnicity (Black vs white)    | 0.637 (0.069) *              | 0.767 (0.073) *              | 0.714 (0.079) *              | 0.500 (0.078) *              | 0.396 (0.079) *              | 0.634 (0.086) *              | 0.749 (0.093) *              | 0.569 (0.129) *              | 0.633 (0.080) *               |
| Race/ethnicity (Hispanic vs white) | 0.273 (0.094) †              | 0.440 (0.102) *              | 0.303 (0.125) ‡              | 0.352 (0.118) †              | 0.301 (0.132) ‡              | 0.180 (0.148)                | 0.153 (0.188)                | 0.639 (0.337)                | 0.263 (0.088) †               |
| Race/ethnicity (other vs white)    | 0.185 (0.077) ‡              | 0.241 (0.083) †              | 0.231 (0.081) †              | 0.208 (0.094) ‡              | 0.092 (0.099)                | 0.395 (0.100) *              | 0.334 (0.106) †              | 0.175 (0.159)                | 0.285 (0.098) †               |
| High school education (vs greater) | 0.339 (0.041) *              | 0.314 (0.040) *              | 0.338 (0.042) *              | 0.309 (0.043) *              | 0.315 (0.044) *              | 0.336 (0.046) *              | 0.355 (0.054) *              | 0.293 (0.072) *              | 0.332 (0.051) *               |
| Employed (vs otherwise)            | -0.322 (0.045) *             | -0.270 (0.042) *             | -0.355 (0.044) *             | -0.300 (0.046) *             | -0.362 (0.046) *             | -0.325 (0.048) *             | -0.380 (0.056) *             | -0.378 (0.077) *             | -0.419 (0.052) *              |
| <b>Random effects</b>              |                              |                              |                              |                              |                              |                              |                              |                              |                               |
| N state                            | 51                           | 51                           | 50                           | 51                           | 50                           | 50                           | 48                           | 49                           | 51                            |
| $\sigma^2$                         | 0.6478                       | 0.6222                       | 0.6513                       | 0.6824                       | 0.6707                       | 0.6410                       | 0.6995                       | 0.7333                       | 0.8202                        |
| $\tau_{00}$ , state                | 0.0291                       | 0.0378                       | 0.0379                       | 0.0264                       | 0.0087                       | 0.0096                       | 0.0149                       | 0.0341                       | 0.0262                        |
| ICC state                          | 0.0430                       | 0.0572                       | 0.0550                       | 0.0373                       | 0.0127                       | 0.0148                       | 0.0209                       | 0.0444                       | 0.0310                        |
| Test of random effect: $\chi^2_1$  | 26.1*                        | 38.4*                        | 30.5*                        | 23.5*                        | 3.43                         | 3.11                         | 5.47‡                        | 7.31†                        | 8.65†                         |

\* p < 0.001; † p < 0.01; ‡ p < 0.05

Table S4. Cigarette affordability (relative income price) across all US states from 2003 to 2015 (ITC US Survey Wave 2–Wave 9).

| Region    | State | Wave 2 | Wave 3 | Wave 4 | Wave 5 | Wave 6 | Wave 7 | Wave 8 | Wave 9a | Wave 9b | Trend                                                                                 |
|-----------|-------|--------|--------|--------|--------|--------|--------|--------|---------|---------|---------------------------------------------------------------------------------------|
|           |       | (2003) | (2004) | (2005) | (2006) | (2007) | (2008) | (2010) | (2013)  | (2015)  |                                                                                       |
| Northeast | CT    | 2.82   | 2.97   | 2.53   | 2.54   | 2.37   | 2.73   | 3.67   | 4.65    | 4.23    | 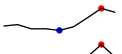   |
|           | MA    | 2.53   | 2.65   | 3.22   | 2.60   | 2.50   | 2.86   | 3.48   | 4.73    | 3.44    |    |
|           | ME    | 2.54   | 2.81   | 3.11   | 2.42   | 2.43   | 2.68   | 3.35   | 3.79    | 3.86    |    |
|           | NH    | 2.49   | 2.34   | 2.13   | 2.27   | 2.32   | 2.43   | 3.21   | 3.84    | 3.36    |    |
|           | NJ    | 2.59   | 3.13   | 2.85   | 2.54   | 2.37   | 2.73   | 3.35   | 4.47    | 3.52    |    |
|           | NY    | 3.11   | 3.00   | 2.92   | 3.21   | 2.47   | 2.80   | 3.28   | 3.81    | 4.93    |    |
|           | PA    | 2.69   | 2.97   | 3.06   | 2.92   | 2.69   | 3.06   | 4.15   | 4.93    | 3.57    |    |
|           | RI    | 2.17   | 2.48   | 2.40   | 2.48   | 2.35   | 2.66   | 3.40   | 4.11    | 3.74    |    |
|           | VT    | 2.37   | 2.21   | 2.61   | 2.42   | 2.35   | 2.58   | 3.42   | 4.07    | 3.63    |    |
| Midwest   | IA    | 2.16   | 2.07   | 1.71   | 2.00   | 2.27   | 2.60   | 3.27   | 3.67    | 3.16    |    |
|           | IL    | 2.42   | 3.09   | 3.06   | 2.82   | 2.49   | 3.05   | 3.75   | 4.04    | 3.92    |   |
|           | IN    | 2.33   | 2.09   | 2.90   | 2.38   | 2.44   | 2.74   | 3.82   | 3.98    | 4.17    |  |
|           | KS    | 1.89   | 2.04   | 2.46   | 2.10   | 2.24   | 2.63   | 3.44   | 3.96    | 3.71    |  |
|           | MI    | 2.89   | 2.73   | 3.21   | 3.26   | 2.53   | 2.86   | 3.64   | 4.09    | 4.20    |  |
|           | MN    | 2.21   | 2.55   | 2.63   | 2.76   | 2.40   | 2.63   | 3.25   | 3.63    | 3.95    |  |
|           | MO    | 2.07   | 2.11   | 2.05   | 2.13   | 2.23   | 2.44   | 3.28   | 3.31    | 3.34    |  |
|           | ND    | 2.24   | 2.08   | n/a    | 2.23   | 2.23   | 2.52   | 3.36   | 3.81    | 3.50    |  |
|           | NE    | 2.49   | 2.19   | 2.39   | 2.24   | 2.32   | 2.69   | 3.48   | 3.57    | 3.19    |  |
|           | OH    | 2.38   | 2.04   | 2.66   | 2.52   | 2.40   | 2.72   | 3.69   | 3.89    | 4.18    |  |
|           | SD    | 2.19   | 2.28   | 2.68   | 2.55   | 2.37   | 2.70   | 3.68   | n/a     | 3.71    |  |
|           | WI    | 2.35   | 2.46   | 2.61   | 2.54   | 2.50   | 3.07   | 3.85   | 5.59    | 4.17    |  |
| South     | AL    | 2.48   | 2.79   | 2.86   | 2.51   | 2.39   | 3.03   | 3.77   | 3.94    | 3.93    |  |
|           | AR    | 2.55   | 2.81   | 3.08   | 2.76   | 2.52   | 2.92   | 4.28   | 5.22    | 4.95    |  |
|           | DC    | 3.46   | 3.69   | 3.79   | 3.39   | n/a    | n/a    | n/a    | 5.56    | 5.20    |  |
|           | DE    | 2.03   | 2.16   | 2.06   | 2.46   | 2.41   | 2.77   | 3.71   | 4.57    | 4.27    |  |
|           | FL    | 2.30   | 2.10   | 2.25   | 2.00   | 2.15   | 2.48   | 3.60   | 5.19    | 3.88    |  |
|           | GA    | 2.19   | 2.52   | 2.32   | 2.25   | 2.76   | 3.10   | 3.98   | 5.33    | 3.94    |  |
|           | KY    | 2.21   | 2.03   | 2.51   | 2.42   | 2.50   | 2.50   | 3.77   | 4.04    | 3.41    |  |
|           | LA    | 2.46   | 2.53   | 2.57   | 2.80   | 2.61   | 2.87   | 4.04   | 4.50    | 4.12    |  |
|           | MD    | 2.38   | 2.48   | 2.61   | 2.44   | 2.54   | 3.05   | 4.54   | 4.34    | 3.88    |  |
|           | MS    | 2.75   | 2.53   | 2.71   | 2.67   | 2.44   | 3.05   | 4.20   | 4.34    | 6.11    |  |
|           | NC    | 1.97   | 2.10   | 2.27   | 2.33   | 2.51   | 3.09   | 3.75   | 4.43    | 3.91    |  |
|           | OK    | 2.42   | 2.22   | 2.66   | 2.66   | 2.59   | 3.15   | 4.51   | 4.39    | 3.44    |  |
|           | SC    | 2.42   | 2.06   | 2.08   | 2.08   | 2.54   | 3.00   | 4.30   | 4.78    | 3.81    |  |
|           | TN    | 2.68   | 2.29   | 2.54   | 2.21   | 2.49   | 2.94   | 3.92   | 4.46    | 4.61    |  |
|           | TX    | 2.51   | 2.45   | 2.33   | 2.40   | 2.60   | 2.74   | 3.18   | 4.29    | 4.23    |  |
|           | VA    | 1.86   | 1.91   | 2.21   | 2.16   | 2.21   | 2.69   | 3.45   | 3.76    | 2.98    |  |
|           | WV    | 3.01   | 3.12   | 3.42   | 2.63   | 2.68   | 2.85   | 3.59   | 3.99    | 3.69    |  |
| West      | AK    | 2.71   | 2.83   | 3.01   | 2.85   | 2.50   | 3.16   | 3.81   | 5.09    | 3.76    |  |
|           | AZ    | 2.46   | 2.50   | 3.01   | 2.71   | 2.58   | 2.81   | 3.57   | 5.36    | 3.94    |  |
|           | CA    | 3.05   | 2.70   | 2.72   | 2.75   | 2.75   | 2.97   | 4.28   | 4.66    | 4.10    |  |
|           | CO    | 1.89   | 1.64   | 2.24   | 2.11   | 2.44   | 2.77   | 3.18   | 3.83    | 3.33    |  |
|           | HI    | 2.40   | n/a    | 2.20   | 2.52   | 2.43   | 3.27   | n/a    | n/a     | 4.61    |  |
|           | ID    | 2.28   | 2.27   | 2.71   | 2.30   | 2.35   | 2.60   | 3.47   | 4.43    | 3.71    |  |
|           | MT    | 2.44   | 2.27   | 2.66   | 2.76   | 2.49   | 2.75   | 3.75   | 4.39    | 3.85    |  |
|           | NM    | 2.41   | 3.28   | 2.60   | 2.59   | 2.75   | 3.02   | 3.76   | 5.26    | 3.56    |  |
|           | NV    | 1.83   | 2.15   | 2.25   | 2.16   | 2.42   | 2.59   | 3.50   | 4.51    | 3.90    |  |
|           | OR    | 3.03   | 2.61   | 3.06   | 2.48   | 2.59   | 2.97   | 3.90   | 4.04    | 3.72    |  |
|           | UT    | 2.66   | 2.68   | 2.42   | 2.64   | 2.50   | 2.90   | 3.68   | 3.98    | 3.93    |  |
|           | WA    | 2.76   | 2.67   | 3.29   | 3.12   | 2.47   | 2.83   | 3.77   | 4.94    | 3.99    |  |
|           | WY    | 2.53   | 2.31   | 2.50   | 2.39   | 2.23   | 2.52   | n/a    | 3.96    | 3.49    |  |

n/a: No observations in a given state and survey wave to estimate self-reported price.
